# Supplementary material
Source: MDPI journal article supplement (https://www.mdpi.com/1996-1073/16/4/1919)
Supplement: s1 [file s1]

## Supplementary Material

Table S1: Kinetics and thermodynamics parameters value calculated by FWO, KAS and Friedman methods at a heating rate of 5°C /min

| Method     | FWO                     |                |                |               | KAS                     |                |                |               | FRIEDMAN                |                |                |               |
|------------|-------------------------|----------------|----------------|---------------|-------------------------|----------------|----------------|---------------|-------------------------|----------------|----------------|---------------|
| Conversion | A<br>(s <sup>-1</sup> ) | ΔH<br>(kJ/mol) | ΔG<br>(kJ/mol) | ΔS<br>(J/mol) | A<br>(s <sup>-1</sup> ) | ΔH<br>(kJ/mol) | ΔG<br>(kJ/mol) | ΔS<br>(J/mol) | A<br>(s <sup>-1</sup> ) | ΔH<br>(kJ/mol) | ΔG<br>(kJ/mol) | ΔS<br>(J/mol) |
| 0.2        | $4.92 \times 10^{16}$   | 193.50         | 156.18         | 62.13         | $2.72 \times 10^{16}$   | 190.61         | 156.25         | 57.20         | $1.52 \times 10^{17}$   | 199.01         | 156.04         | 71.53         |
| 0.25       | $3.00 \times 10^{16}$   | 190.98         | 156.24         | 57.83         | $1.72 \times 10^{16}$   | 188.26         | 156.31         | 53.18         | $5.88 \times 10^{17}$   | 205.48         | 155.88         | 82.57         |
| 0.3        | $4.25 \times 10^{16}$   | 192.59         | 156.19         | 60.59         | $2.45 \times 10^{16}$   | 189.91         | 156.26         | 56.00         | $2.50 \times 10^{18}$   | 212.45         | 155.72         | 94.44         |
| 0.35       | $5.65 \times 10^{16}$   | 193.89         | 156.16         | 62.81         | $3.27 \times 10^{16}$   | 191.22         | 156.23         | 58.25         | $9.81 \times 10^{18}$   | 219.05         | 155.56         | 105.68        |
| 0.4        | $2.39 \times 10^{17}$   | 200.84         | 155.99         | 74.66         | $1.36 \times 10^{17}$   | 198.11         | 156.05         | 70.01         | $3.63 \times 10^{19}$   | 225.37         | 155.42         | 116.43        |
| 0.45       | $7.67 \times 10^{17}$   | 206.45         | 155.85         | 84.23         | $4.35 \times 10^{17}$   | 203.69         | 155.92         | 79.53         | $2.58 \times 10^{19}$   | 223.63         | 155.46         | 113.47        |
| 0.5        | $3.38 \times 10^{17}$   | 202.39         | 155.94         | 77.30         | $1.95 \times 10^{17}$   | 199.71         | 156.01         | 72.75         | $1.87 \times 10^{18}$   | 210.73         | 155.75         | 91.52         |
| 0.55       | $1.54 \times 10^{17}$   | 198.50         | 156.04         | 70.69         | $9.10 \times 10^{16}$   | 195.92         | 156.10         | 66.29         | $2.49 \times 10^{17}$   | 200.82         | 155.98         | 74.65         |
| 0.6        | $5.36 \times 10^{16}$   | 193.29         | 156.17         | 61.80         | $3.23 \times 10^{16}$   | 190.81         | 156.23         | 57.57         | $3.49 \times 10^{17}$   | 202.42         | 155.94         | 77.36         |
| 0.65       | $1.41 \times 10^{17}$   | 197.94         | 156.05         | 69.73         | $8.39 \times 10^{16}$   | 195.40         | 156.11         | 65.40         | $1.20 \times 10^{21}$   | 242.15         | 155.06         | 144.96        |
| 0.7        | $1.85 \times 10^{21}$   | 244.12         | 155.02         | 148.31        | $9.55 \times 10^{20}$   | 240.88         | 155.09         | 142.81        | $1.81 \times 10^{31}$   | 357.16         | 153.15         | 339.58        |
| Mean       | $1.68 \times 10^{20}$   | 201.32         | 155.98         | 75.46         | $8.69 \times 10^{19}$   | 198.59         | 156.05         | 70.82         | $1.65 \times 10^{30}$   | 227.11         | 155.45         | 119.29        |
